# Supplementary material for: Helix oscillation of polyacetylene esters detected by dynamic 1H NMR, IR, and UV-vis methods in solution
Source: Royal Society of Chemistry journal article supplement (doi:10.1039/c3py00295k), 2013-01-01
Supplement: c3py00295k.pdf [file c3py00295k.pdf]

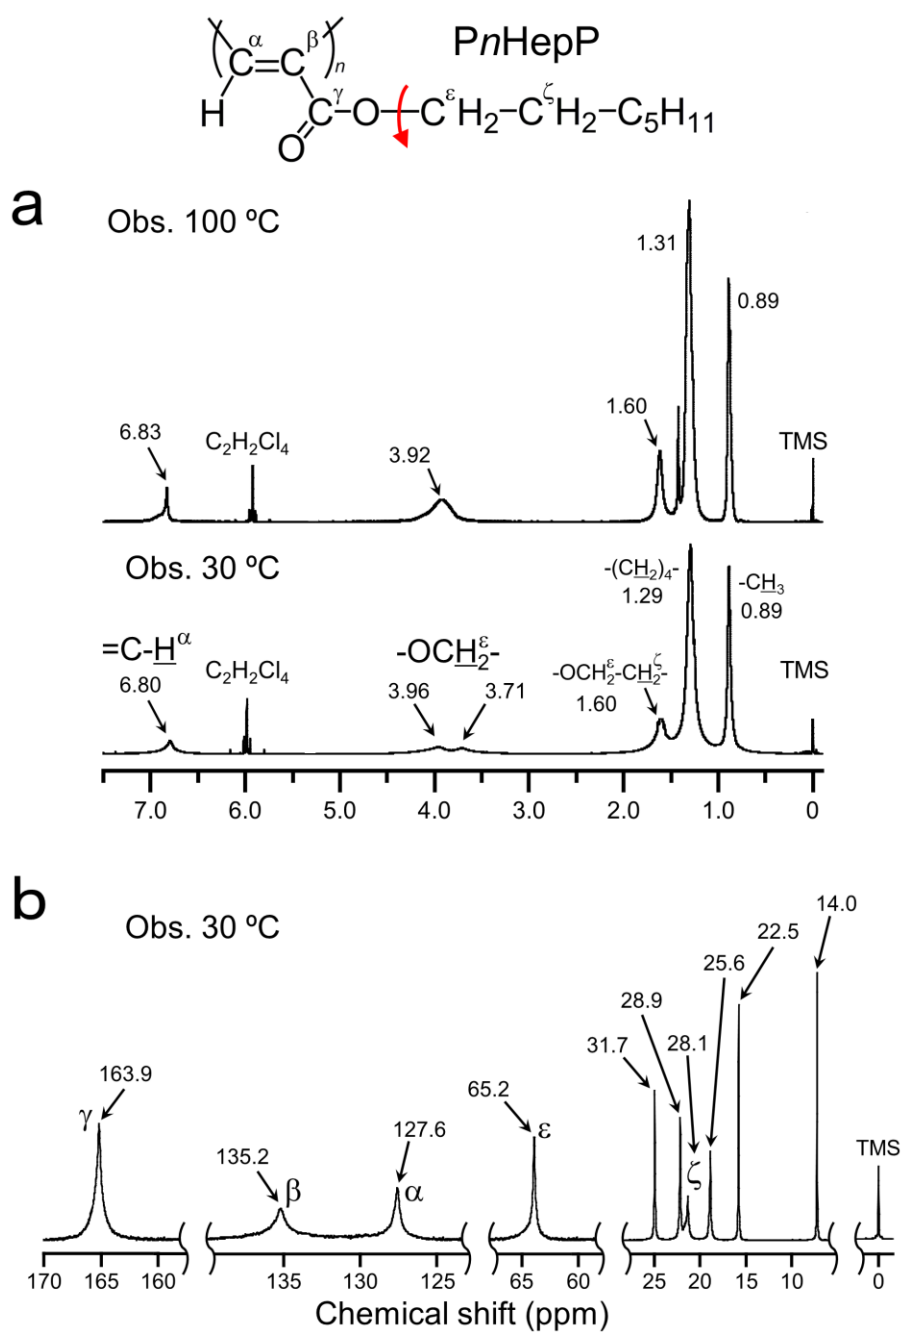

Fig. SI\_1 a:  $^1\text{H}$  NMR spectra of PnHepP observed at 30 and 100 °C,  
 b:  $^{13}\text{C}$  NMR spectra of PnHepP observed at 30 °C.

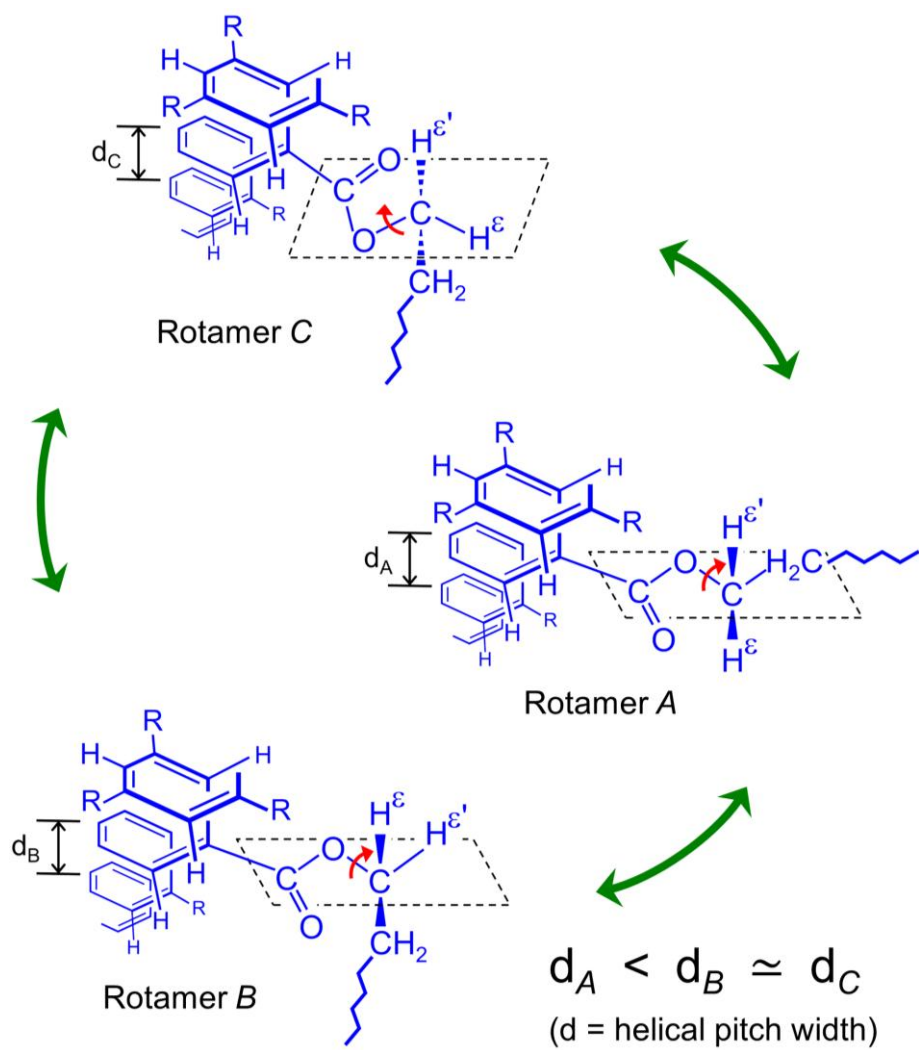

Fig. SI\_2 Perspective views showing right-handed helical structures including carbonyl moiety of rotamers A, B, and C.
